# Supplementary material
Source: ML conference proceedings conference paper supplement (https://proceedings.mlr.press/v139/li21d.html)
Supplement: Supplementary file [file li21d-supp.pdf]

| Method    | Convert AP | Not Convert AP |
|-----------|------------|----------------|
| VGG-16    | 24.88      | 49.53          |
| ResNet-34 | 50.21      | 52.87          |

Table 8. Impact of AvgPool2d layers in SNN.

## A. Conversion Error Analysis

We use  $\|\cdot\|$  to denote the Frobenius norm. According to Eq. (1) and Eq. (10), the activation of ANN can be computed by

$$\begin{aligned} \|\mathbf{x}^{(n)} - \bar{\mathbf{s}}^{(n)}\| &= \|h(\mathbf{W}^{(n-1)}\mathbf{x}^{(n-1)}) - g(\mathbf{W}^{(n-1)}\bar{\mathbf{s}}^{(n-1)})\| \\ &= \|h(\mathbf{W}^{(n-1)}\mathbf{x}^{(n-1)}) - h(\mathbf{W}^{(n-1)}\bar{\mathbf{s}}^{(n-1)}) + h(\mathbf{W}^{(n-1)}\bar{\mathbf{s}}^{(n-1)}) - g(\mathbf{W}^{(n-1)}\bar{\mathbf{s}}^{(n-1)})\| \end{aligned} \quad (20)$$

$$\leq \|\mathbf{W}^{(n-1)}(\mathbf{x}^{(n-1)} - \bar{\mathbf{s}}^{(n-1)}) + Errr^{(n)}\|, \quad (21)$$

where  $h(\cdot)$  is the ReLU function in ANN and  $g(\cdot)$  is the clipfloor function in Eq. (10). Eq. (21) is based on the fact that activation  $h(\cdot)$  is a piecewise linear function with gradient less than or equal to 1.  $Errr^{(n)} = h(\mathbf{W}^{(n-1)}\bar{\mathbf{s}}^{(n-1)}) - g(\mathbf{W}^{(n-1)}\bar{\mathbf{s}}^{(n-1)})$ . Recursively apply Eq. (21), then we have

$$\begin{aligned} \|\mathbf{x}^{(n)} - \bar{\mathbf{s}}^{(n)}\| &\leq \|\mathbf{W}^{(n-1)}(\mathbf{x}^{(n-1)} - \bar{\mathbf{s}}^{(n-1)}) + Errr^{(n)}\| \\ &\leq \|\mathbf{W}^{(n-1)}\mathbf{W}^{(n-2)}(\mathbf{x}^{(n-2)} - \bar{\mathbf{s}}^{(n-2)}) + \mathbf{W}^{(n-1)}Errr^{(n-1)} + Errr^{(n)}\| \end{aligned} \quad (22)$$

$$\leq \|(\mathbf{x}^{(1)} - \bar{\mathbf{s}}^{(1)}) \prod_{\ell=1}^n \mathbf{W}^{(\ell)} + \sum_{\ell=1}^n Errr^{(\ell)} \prod_{k=\ell}^n \mathbf{W}^{(k)}\| \quad (23)$$

Note that the first term in Eq. (23) is 0 if we use the same image input to ANN and SNN.

## B. Converting Average Pooling Layers

Consider a batch of input to AvgPool2d layers with size of  $[N, C, H, W]$  where  $N$  is the batch size,  $C$  is the channel number,  $H$  and  $W$  are the width and heights of inputs, as well as kernel size of AvgPool2d represented by  $[kW, kH]$ , we can precisely describe the AvgPool2d forwarding as

$$out(N_i, C_j, h, w) = \frac{1}{kW \times kH} \sum_{m=0}^{kH-1} \sum_{n=0}^{kW-1} input(N_i, C_j, stride[0] \times h + m, stride[1] \times w + n). \quad (24)$$

This forwarding function is a special case of depthwise Conv2d, where the kernel size of Conv2d is equal to  $[kW, kH]$ . The weights of the Conv2d should be constant for all elements in the kernel  $\frac{1}{kW \times kH}$ , and the bias of the Conv2d should be zero.

We hereby conduct an ablation study that investigates the impact of AvgPool2d layers conversion. We test VGG-16 and ResNet-34 on ImageNet ( $T = 32$ , Light Pipeline). VGG-16 has five  $2 \times 2$  AvgPool2d layers. ResNet-34 has one  $2 \times 2$  and one  $7 \times 7$  AvgPool2d layers. On VGG-16, the accuracy is much lower if we convert the AvgPool2d layers. On ResNet-34, the impact of AvgPool2d layers is much lower than that on VGG-16, with only a 2% accuracy drop if we convert AP.

## C. ANN Training Implementation

### C.1. ImageNet

The ImageNet dataset (Deng et al., 2009) contains 120M training images and 50k validation images. For training pre-processing, we random crop and resize the training images to  $224 \times 224$ . We additionally apply CollorJitter with brightness=0.2, contrast=0.2, saturation=0.2, and hue=0.1. For test images, they are center-cropped to the same size. For all architectures we tested, the Max Pooling layers are replaced to Average Pooling layers and are further converted to depthwise convolutional layers. The ResNet-34 contains a deep-stem layer (i.e., three  $3 \times 3$  conv. layers to replace the original  $7 \times 7$  first conv. layer) as described in He et al. (2019). We use Stochastic Gradients Descent with a momentum of 0.9 as the optimizer. The learning rate is set to 0.1 and followed by a cosine decay schedule (Loshchilov & Hutter, 2016). Weight decay is set to  $10^{-4}$ , and the networks are optimized for 120 epochs. We also apply label smooth (Szegedy et al., 2016)(factor=0.1)

and EMA update with 0.999 decay rate to optimize the model. For the MobileNet pre-trained model, we download it from [pytorchcv<sup>2</sup>](https://pytorchcv2).

## C.2. CIFAR

The CIFAR 10 and CIFAR100 dataset (Krizhevsky et al.) contains 50k training images and 10k validation images. We set padding to 4 and randomly cropped the training images to  $32 \times 32$ . Other data augmentations include (1) random horizontal flip, (2) Cutout (DeVries & Taylor, 2017) and (3) AutoAugment (Cubuk et al., 2019). For ResNet-20, we follow prior works (Han et al., 2020; Han & Roy, 2020) who modify the official network structures proposed in He et al. (2016) to make a fair comparison. The modified ResNet-20 contains 4 stages with an additional deep-stem layer. For VGG-16 without BN layers, we add Dropout with a 0.25 drop rate to regularize the network. For MobileNet-CIFAR, we set the stride of the first conv. Layer to 1 to decrease the stage number to 4. For the model with BN layers, we use Stochastic Gradients Descent with a momentum of 0.9 as the optimizer. The learning rate is set to 0.1 and followed by a cosine decay schedule (Loshchilov & Hutter, 2016). Weight decay is set to  $5 \times 10^{-4}$  and the networks are optimized for 300 epochs. For networks without BN layers, we set weight decay to  $10^{-4}$  and learning rate to 0.005.

## D. Results on CIFAR

---

<sup>2</sup><https://pypi.org/project/pytorchcv/>

Spiking Neural Networks Calibration

| Method                                                  | Use BN | Convert AP | ANN Acc. | $T = 32$     | $T = 64$     | $T = 128$    | $T = 256$    | $T \geq 2048$ |
|---------------------------------------------------------|--------|------------|----------|--------------|--------------|--------------|--------------|---------------|
| <b>ResNet-20 (He et al., 2016) CIFAR100</b>             |        |            |          |              |              |              |              |               |
| Spike-Norm (Sengupta et al., 2018)                      | ✗      | ✗          | 69.72    | -            | -            | -            | -            | 64.09         |
| RMP (Han et al., 2020)                                  | ✗      | ✗          | 68.72    | 27.64        | 46.91        | 57.69        | 64.06        | 67.82         |
| TSC (Han & Roy, 2020)                                   | ✗      | ✗          | 68.72    | -            | -            | 58.42        | 65.27        | 68.18         |
| Opt. (Deng & Gu, 2021)*                                 | ✗      | ✓          | 68.40    | 63.39        | 67.51        | 68.37        | 68.53        | 68.37         |
| <b>Ours (Light Pipeline)</b>                            | ✗      | ✓          | 68.40    | <b>65.14</b> | <b>67.63</b> | <b>68.28</b> | <b>68.42</b> | 68.37         |
| Opt. (Deng & Gu, 2021)*                                 | ✓      | ✓          | 77.16    | 51.27        | 70.12        | 75.81        | 77.22        | 77.19         |
| <b>Ours (Light Pipeline)</b>                            | ✓      | ✓          | 77.16    | <b>75.53</b> | <b>77.08</b> | <b>77.50</b> | <b>77.59</b> | 77.25         |
| <b>Ours (Advanced Pipeline)</b>                         | ✓      | ✓          | 77.16    | <b>76.32</b> | <b>77.29</b> | <b>77.73</b> | <b>77.63</b> | 77.25         |
| <b>VGG-16 (Simonyan &amp; Zisserman, 2014) CIFAR100</b> |        |            |          |              |              |              |              |               |
| Spike-Norm (Sengupta et al., 2018)                      | ✗      | ✗          | 71.22    | -            | -            | -            | -            | 70.77         |
| RMP (Han et al., 2020)                                  | ✗      | ✗          | 71.22    | -            | -            | 63.76        | 68.34        | 70.93         |
| TSC (Han & Roy, 2020)                                   | ✗      | ✗          | 71.22    | -            | -            | 69.86        | 70.65        | 70.97         |
| Opt. (Deng & Gu, 2021)*                                 | ✗      | ✓          | 70.21    | 56.16        | 62.93        | 67.45        | 69.36        | 70.35         |
| <b>Ours (Light Pipeline)</b>                            | ✗      | ✓          | 70.21    | <b>64.53</b> | <b>67.14</b> | <b>68.99</b> | <b>69.98</b> | 70.30         |
| Opt. (Deng & Gu, 2021)*                                 | ✓      | ✓          | 77.89    | 7.64         | 21.84        | 55.04        | 73.54        | 77.71         |
| <b>Ours (Light Pipeline)</b>                            | ✓      | ✓          | 77.89    | <b>65.73</b> | <b>72.38</b> | <b>75.82</b> | <b>77.12</b> | 77.87         |
| <b>Ours (Advanced Pipeline)</b>                         | ✓      | ✓          | 77.89    | <b>73.55</b> | <b>76.64</b> | <b>77.40</b> | <b>77.68</b> | 77.87         |
| <b>MobileNet (Howard et al., 2017) CIFAR100</b>         |        |            |          |              |              |              |              |               |
| Opt. (Deng & Gu, 2021)*                                 | ✓      | ✓          | 73.23    | 1.28         | 4.88         | 39.39        | 65.79        | 73.01         |
| <b>Ours (Light Pipeline)</b>                            | ✓      | ✓          | 73.23    | <b>40.06</b> | <b>62.81</b> | <b>69.41</b> | <b>71.98</b> | 73.19         |
| <b>Ours (Advanced Pipeline)</b>                         | ✓      | ✓          | 73.23    | <b>42.64</b> | <b>63.24</b> | <b>71.02</b> | <b>72.54</b> | 73.18         |
| <b>ResNet-20 (He et al., 2016) CIFAR10</b>              |        |            |          |              |              |              |              |               |
| Spike-Norm (Sengupta et al., 2018)                      | ✗      | ✗          | 89.10    | -            | -            | -            | -            | 87.46         |
| Hybrid Train (Rathi et al., 2019)                       | ✗      | ✗          | 93.15    | -            | -            | -            | 92.22        | 92.94         |
| RMP (Han et al., 2020)                                  | ✗      | ✗          | 91.47    | -            | -            | 87.60        | 89.37        | 91.36         |
| TSC (Han & Roy, 2020)                                   | ✗      | ✗          | 91.47    | -            | 69.38        | 88.57        | 90.10        | 91.42         |
| Opt. (Deng & Gu, 2021)*                                 | ✗      | ✓          | 93.94    | 86.67        | 91.96        | 93.48        | 93.76        | 93.94         |
| <b>Ours (Light Pipeline)</b>                            | ✗      | ✓          | 93.94    | <b>93.00</b> | <b>93.61</b> | <b>93.85</b> | <b>93.89</b> | 93.94         |
| Opt. (Deng & Gu, 2021)*                                 | ✓      | ✓          | 95.46    | 84.06        | 92.48        | 94.68        | 95.30        | 94.42         |
| <b>Ours (Light Pipeline)</b>                            | ✓      | ✓          | 95.46    | <b>94.44</b> | <b>95.20</b> | <b>95.29</b> | <b>95.36</b> | 95.47         |
| <b>Ours (Advanced Pipeline)</b>                         | ✓      | ✓          | 95.46    | <b>94.78</b> | <b>95.30</b> | <b>95.42</b> | <b>95.41</b> | 95.45         |
| <b>VGG-16 (Simonyan &amp; Zisserman, 2014) CIFAR10</b>  |        |            |          |              |              |              |              |               |
| Spike-Norm (Sengupta et al., 2018)                      | ✗      | ✗          | 91.70    | -            | -            | -            | -            | 91.55         |
| Hybrid Train (Rathi et al., 2019)                       | ✗      | ✗          | 92.81    | -            | -            | 91.13        | -            | 92.48         |
| RMP (Han et al., 2020)                                  | ✗      | ✗          | 93.63    | 60.30        | 90.35        | 92.41        | 93.04        | 93.63         |
| TSC (Han & Roy, 2020)                                   | ✗      | ✗          | 93.63    | -            | 92.79        | 93.27        | 93.45        | 93.63         |
| Opt. (Deng & Gu, 2021)*                                 | ✗      | ✓          | 93.51    | 88.79        | 91.12        | 92.74        | 93.29        | 93.55         |
| <b>Ours (Light Pipeline)</b>                            | ✗      | ✓          | 93.51    | <b>91.82</b> | <b>92.57</b> | <b>93.21</b> | <b>93.35</b> | 93.54         |
| Opt. (Deng & Gu, 2021)*                                 | ✓      | ✓          | 95.72    | 76.24        | 90.64        | 94.11        | 95.33        | 95.73         |
| <b>Ours (Light Pipeline)</b>                            | ✓      | ✓          | 95.72    | <b>94.02</b> | <b>95.20</b> | <b>95.61</b> | <b>95.77</b> | 95.73         |
| <b>Ours (Advanced Pipeline)</b>                         | ✓      | ✓          | 95.72    | <b>93.71</b> | <b>95.14</b> | <b>95.65</b> | <b>95.79</b> | 95.79         |
| <b>MobileNet (Howard et al., 2017) CIFAR10</b>          |        |            |          |              |              |              |              |               |
| Opt. (Deng & Gu, 2021)*                                 | ✓      | ✓          | 92.48    | 9.98         | 23.99        | 79.35        | 90.49        | 92.35         |
| <b>Ours (Light Pipeline)</b>                            | ✓      | ✓          | 92.48    | <b>81.94</b> | <b>89.47</b> | <b>91.61</b> | <b>92.20</b> | 92.44         |
| <b>Ours (Advanced Pipeline)</b>                         | ✓      | ✓          | 92.48    | <b>82.37</b> | <b>90.40</b> | <b>91.70</b> | <b>92.29</b> | 92.47         |

Table 9. Comparison of our algorithm with other existing SNN conversion works on CIFAR10 and CIFAR100. *Use BN* means use BN layers to optimize ANN, *Convert AP* means use Conv layers to replace Average Pooling layers. \* denotes self-implementation results.
